1                   **Impaired hepatic autophagy exacerbates xenobiotics induced liver**  
2                                           **injury**

3           Katherine Byrnes<sup>¶</sup>, Niani Tiaye Bailey<sup>¶</sup>, Arissa Mercer, Spandan Joshi, Gang Liu, Xiao-  
4                                           Ming Yin, Bilon Khambu\*

5                   Department of Pathology and Laboratory Medicine, Tulane University School of  
6                                           Medicine, New Orleans, LA 70112, USA.

7  
8  
9           **\*Address corresponding to: Dr. Bilon Khambu**

10           Department of Pathology and Laboratory Medicine

11           Tulane University School of Medicine

12           New Orleans, LA 70112, USA

13           Email: [bkhambu@tulane.edu](mailto:bkhambu@tulane.edu)

14  
15           <sup>¶</sup>: These two authors share the first authorship

16  
17  
18           Running Title: Autophagy's defense against xenobiotic toxicity

19  
20  
21  
22           Financial Support: The authors are in part supported by Louisiana BoR(BK), BeHeard  
23           Science Challenge(BK), ASIP/SROPP(BK), NIH/NIDDK grants R01 DK116605  
24           (XMY). The funding sources do not participate in the study design or execution.

25  
26  
27           Conflict of Interest: The authors have declared that no conflict of interest exists.

28

29 **ABSTRACT**

30 Xenobiotics can activate the hepatic survival pathway, but it is not clear how impaired hepatic  
31 survival pathways may affect xenobiotic-induced liver injury. We investigated the role of hepatic  
32 autophagy, a cellular survival pathway, in cholestatic liver injury driven by a xenobiotic. Here  
33 we demonstrate that DDC diet impaired autophagic flux, resulting in the accumulation of p62-  
34 Ub-intrahyaline bodies (IHBs) but not the Mallory Denk-Bodies (MDBs). Impaired autophagic  
35 flux was linked to a deregulated hepatic protein-chaperonin system and a significant decline in  
36 Rab family proteins. In addition, we demonstrate that heterozygous deletion of *Atg7*, a key  
37 autophagy gene, aggravated the p62-Ub-IHB accumulation and cholestatic liver injury.  
38 Moreover, we showed that p62-Ub-IHB accumulation did not activate the proteostasis-related  
39 ER stress signaling pathway, but rather activated the NRF2 pathway and suppressed the FXR  
40 nuclear receptor, resulting in cholestatic liver injury. *Conclusion:* Impaired autophagy  
41 exacerbates xenobiotic-induced cholestatic liver injury. Promotion of autophagy may represent a  
42 new therapeutic approach for xenobiotic-induced liver injury.

43 **Key Words:**Hepatic proteostasis, Protein aggregates, Cholestasis

44

45

## 46 INTRODUCTION

47 Xenobiotics are metabolized and excreted primarily by the liver. Xenobiotics or their reactive  
48 metabolites and intermediaries injure tissue and cells, causing liver dysfunction. Host cells  
49 respond to xenobiotic exposure by activating survival mechanisms such as macroautophagy,  
50 hereafter referred to as autophagy, to minimize the damaging effects of the xenobiotics. Despite  
51 extensive research into xenobiotic-mediated cell death (apoptosis and necrosis), little attention  
52 has been paid to how host survival mechanisms might mitigate xenobiotic-induced cell death and  
53 tissue damage.

54 Autophagy is an intracellular lysosomal degradative pathway widely known for nutrient  
55 turnover, organelle, or signaling protein quality control. In autophagy, cellular proteins and  
56 organelles are wrapped in double-membrane vesicles called autophagosomes[1, 2]. The  
57 autophagosomes then fuse with the lysosome to form autolysosomes and then use lysosomal  
58 degradative enzymes to degrade the cellular contents sequestered in the autophagosomes. A  
59 common response to xenobiotic exposure is the formation of misfolded protein aggregates[3]. As  
60 a protective mechanism, autophagy helps clear these aggregates, aiding in cellular quality control  
61 and ameliorating cellular damage.

62 DDC (3,5-diethoxycarbonyl-1,4-dihydrocollidine) is the most widely used animal model to study  
63 xenobiotic-induced liver injury and fibrosis[4]. Chronic feeding of DDC has long been used to  
64 study the formation of Mallory-Denk bodies (MDBs)[5], primary sclerosing cholangitis  
65 (PSC)[6], porphyrias[6, 7], chronic cholangiopathies[8], biliary fibrosis[8, 9], and ductular  
66 reactions[6, 10].

67 Using an acute DDC diet model of xenobiotic-induced liver injury, we demonstrate that  
68 autophagy impairment causes qualitative accumulation of hepatic proteins such as p62 or Ub  
69 resulting in intrahyaline bodies(IHB) formation. The intrahepatic accumulation of p62-Ub  
70 containing IHB in the liver activates the NRF2 signaling pathway and downregulates the FXR  
71 nuclear receptor, causing bile acid (BA) deregulation. Furthermore, impaired autophagy  
72 exacerbates IHB formation and cholestatic liver injury. Thus, autophagy protects against  
73 xenobiotic toxicity by regulating the formation of p62-Ub IHBs and modulating p62-NRF2-FXR  
74 linked cholestatic liver injury.

## 75 MATERIALS & METHODS

76 **Animal experiments:** All animals used in these experiments were treated with humane care, in  
77 accordance with the guidelines from the National Institutes of Health's Guide for the Care and  
78 Use of Laboratory animals, and with approval from Institutional Animal Care and Use  
79 Committee (IACUC) of Tulane University. Wild type male mice(C57BL/6J) were randomly  
80 assigned to the regular diet fed group and the DDC-diet fed group. Atg7<sup>+/-</sup> mice((C57BL/6J  
81 background) were generated by crossing Alb-Cre mice and the Atg7 F/F control mice as  
82 described previously[11].

83 **DDC diet:** Adult mice of the same age(2 month, approximately 25 gram) were randomly  
84 assigned to either the regular diet group or the DDC diet group. Those in the regular diet group  
85 were fed a regular chow diet of commercially available mouse food pellets (free of xenobiotics)  
86 Mice in the DDC diet were fed a diet containing 0.01% of 3,5-diethoxycarbonyl-1,4-  
87 dihydrocollidine (DDC) for 2-10 weeks. The mice were then humanely sacrificed, and their  
88 livers were collected and frozen to be used for experimental preparations.

89 **Immunofluorescence microscopy:** Paraffin sections were prepared from the liver samples using  
90 a microtome. After deparaffinization and rehydration, these sections were treated with a citrate  
91 buffer (pH 6.0) for antigen retrieval. The slides were then permeabilized and blocked with 5%  
92 donkey or goat serum in PBS with 0.1% Triton X and glycine for one hour. The slides were  
93 incubated at 4°C in a solution of primary antibodies diluted in PBS (**Supplementary antibody**  
94 **list Table 1**). The slides were then washed in PBS with 0.1% Triton X and then incubated with a  
95 solution of PBS containing fluorophore-conjugated secondary antibodies for at least one hour.  
96 Nuclei were stained with Hoechst 33342 (1 µg/ml). Images were obtained using a Nikon Eclipse  
97 TE 200 epi-immunofluorescence microscope and the companion NIS-Elements AR3.2 software.

98 **Serum Parameters analysis:** Blood samples were collected and serum analyzed for ALT,  
99 TBA, TB, TC, and TG using commercially available kits from Pointe Scientific, following the  
100 manufacturer's protocol.

101 **Immunoblotting:** Total liver protein lysate was prepared from the liver samples using RIPA  
102 lysis buffer containing protease inhibitor cocktail. The liver lysate was centrifugation after  
103 homogenizing the samples using an electric homogenizer. Sample total protein lysates'

104 concentrations were measured using a BCA assay (using commercially available kit following  
105 standard protocol) and then separated by sodium dodecyl sulfate polyacrylamide gel  
106 electrophoresis (SDS-PAGE). After SDS-PAGE, the proteins were transferred to PVDF  
107 membrane. The membranes were blocked in TBS with 0.1% Tween 20 (TBS-T) and 5% non-fat  
108 dry milk powder for at least one hour. The membranes were then incubated with primary  
109 antibodies(**Supplementary antibody list Table 1**) overnight at 4°C. The membranes were  
110 washed with TBS-T and incubated with a horseradish peroxidase-conjugated secondary antibody  
111 for 1 hour. Blots were visualized using the immunoblotting chemiluminescence system(Millipore,  
112 MA) kit and BioRad chemiluminescence machine scanner.The densitometry analysis of  
113 immunoblot images was performed using quantity One Software(Bio-Rad). Densitometry values  
114 were normalized to the loading control(Gapdh or Actin) and then converted to units relative to  
115 the untreated control.

116 **Quantitative PCR:** A GeneJET RNA Purification Kit (Thermo Fisher Scientific) was used to  
117 extract the total RNA from homogenized liver samples, according to the manufacturer's  
118 protocol. 1 µg total RNA was then used to synthesize cDNA using a M-MLV Reverse  
119 Transcriptase Enzyme System (Life Technologies, Thermo Fisher Scientific) and OligoT  
120 primers. qPCR was performed using SYBR Green Master Mixes on a Quanta studio 3 PCR  
121 machine (Life Technologies–Applied Biosystems, Thermo Fisher Scientific), using gene-specific  
122 primers included in the **Supplementary primer list Table 2**. Gene expression was calculated  
123 using the  $2^{-\Delta\Delta C_t}$  method and normalized to the housekeeping gene Actin.

124 **Hematoxylin and Eosin (H&E) Staining:** Slides with mouse liver tissue, sectioned in paraffin  
125 and fixed in formalin, were stained with H&E according to standard protocol. Images were  
126 obtained using Olympus light microscope and analysed using the companion NIS-Elements  
127 AR3.2 software.

128 **Statistical Analysis:** Data is presented in figures as the mean with error bars representing ±  
129 SEM. SigmaStat 3.5 (Systat Software) was used to perform statistical analysis. Statistical  
130 analysis was performed using P values from at least 3 samples, calculated using a 2-tailed  
131 Student's t test for paired group comparisons or 1-way ANOVA with appropriate post hoc  
132 analysis for multigroup data comparisons. The statistical analysis methods used were chosen  
133 appropriately for variance and distribution fitting. P values of less than 0.05 were considered

134 statistically significant, denoted by “\*,” while p values of less than 0.01 were denoted by “\*\*,”  
135 and p values of less than 0.001 were denoted by “\*\*\*.”

136

## 137 RESULTS

### 138 **1. Acute 3,5-diethoxycarbonyl-1,4-dihydrocollidine (DDC) intoxication leads to accumulation of** 139 **p62 and Ub containing intracytoplasmic hyaline bodies(IHB) but not Mallory-Denk bodies** 140 **(MDBs) in liver.**

141 The liver synthesizes and secretes millions of protein molecules per day, including plasma proteins[12].  
142 Any abnormality during this process can result in intracellular protein accumulation and cause  
143 proteotoxic effects, either through gain or loss of function. Acute feeding of xenobiotic such as DDC,  
144 cause hepatic proteinopathy[13, 14]. The development of hepatic proteinopathy is followed by liver  
145 injury and various other histological hallmarks of common liver diseases. However, it remains unclear  
146 how the DDC diet causes abnormal accumulation of hepatic protein and its mechanism of pathogenic  
147 consequences are less understood.

148 In order to determine the potential role of cell survival mechanism in DDC mediated liver injury we  
149 selected the acute model of DDC intoxication. DDC diet was acutely fed to wild-type mice for 2 weeks  
150 to assess how hepatic protein would change. The gross examination revealed enlarged and dark brown  
151 livers, which are characteristic of DDC (**Fig.1A**). Interestingly, there was no significant elevation in the  
152 level of total hepatic protein level between control and DDC diet-fed mice(**Fig.1B**). The total amount of  
153 liver protein in the liver lysate was also not significantly different as determined by the Coomassie  
154 Brilliant Blue stain(CBB) (**Fig.1C**). Notably, the protein bands patterns in CBB were quite different in  
155 the DDC-exposed liver(**Fig.1C**) indicating a qualitative but not a quantitative change in the hepatic  
156 proteome of DDC-exposed liver.

157 To analyze the qualitative change in the hepatic protein, immunofluorescence staining for  
158 p62/Sequestosome-1 was performed. p62/Sequestosome-1 is a major constituent of IHBs[15]. p62  
159 binds Ubiquitin (Ub) and acts as an adapter linking ubiquitinated species to other proteins. Hence p62  
160 acts as a common denominator in a variety of cytoplasmic inclusions. p62 and Ub proteins, were co-  
161 localized and markedly elevated in immunofluorescence stain (**Fig.1D**). A similar accumulation of p62  
162 was noted in primary hepatocytes isolated from mouse fed with a DDC diet for 2 weeks (**Fig.1E**).  
163 Immunoblot analysis also showed marked elevation of p62 and the high molecular weight(HMW)  
164 aggregated p62 in DDC diet exposed liver(**Fig.1F**). Notably, mRNA expression did not show any  
165 remarkable change for p62(**Fig.1G**). p62 and Ub aggregates can cross-link with the intermediate  
166 filament proteins keratins 8 and 18(K8/K18) to form MDBs[14]. The expression levels of K8 and K18,

167 were elevated at both mRNA and protein levels (**Fig.1F-1G**). Increased levels of both normal and high-  
168 molecular-weight (HMW) size of K8 and K18 were observed in DDC-exposed liver (**Fig.1F-1G**).

169 We next examined whether the p62-Ub containing IHBs contains the K8/K18 proteins as IHBs  
170 formation generally leads to MDB formation[14] and there was a significant elevation of K8/K18  
171 expression in the DDC diet treated condition(**Fig.1G**). Immunofluorescence staining of K8/K18 did not  
172 show the presence of protein aggregates even though immunoblot showed an elevated level of HMW  
173 K8/K18(**Fig.1H, Supplementary Fig1A-1B**). More importantly, the K8/K18 did not co-localize with  
174 the p62 aggregates(**Fig.1H, Supplementary Fig1A-1B**) suggesting that acute DDC cause protein  
175 aggregate of p62 but not the K8/K18. Thus, acute DDC causes a qualitative change in hepatic proteome  
176 and likely sets the stage for aberrant cellular stress signaling. Acute DDC induces the formation of a  
177 p62-Ub inclusion bodies accumulation that are devoid of cytokeratins, suggesting it can be characterized  
178 as IHBs and not MDBs.

179

## 180 **2. DDC deregulates the hepatic protein chaperone system.**

181 Acute DDC exposed liver has an accumulation of p62-Ub IHBs(**Fig.1**). The selective formation  
182 of the hepatic IHBs could be due to failure in the molecular chaperone. Heat shock  
183 proteins(HSPs) serve as molecular chaperones which guide conformations critical for protein  
184 synthesis, folding, translocation, and assembly during cellular stress[16, 17]. During cellular  
185 stress, small HSPs, such as HSP70/90 keep the newly formed misfolded proteins in a folding-  
186 competent state until the physiological situation is improved. Hsp70 can also allow ATP-  
187 dependent refolding of the misfolded proteins. Molecular chaperones such as Hsp25 and Hsp70  
188 were previously described as a component of MDBs[18]. Protein misfolding and subsequent  
189 aggregation in various organelles leads to proteotoxicity. Given the impaired proteostasis and  
190 protein inclusion bodies (IHBs) observed in the acute DDC-diet model, we hypothesized that  
191 deregulated HSPs contribute to improper protein folding, leading to protein accumulation and  
192 then proteotoxic liver injury. We thus examined the impact of DCC-diet on the expression of  
193 molecular chaperonins.

194 HSPs belong to seven major families including HSP110, HSP90, HSP70(A), HSP60(D),  
195 HSP40(DnaJ), HSP47, and HSP10(E)[19]. Of 26 different HSPs expression levels analyzed by  
196 qPCR, we found decreased expression of nearly all of the HSPs, across all of the major heat



197 shock families in the DDC-diet fed liver(**Fig.2A-2G**). Distinct members of the HSPs family  
198 localize to the cytosol, mitochondria, and endoplasmic reticulum(ER)[20]. Irrespective of the  
199 cellular location, all HSPs were downregulated(**Supplementary Fig.2-3**). The downregulation of  
200 mRNA of HSPs was properly reflected in their proteins level(**Fig.2H**).  
201 Transcriptional activation of HSPs is orchestrated by heat shock factor 1(HSF1), wchi rapidly  
202 translocates to HSP genes and induce their expression[21].So we hypothesized that deregulation  
203 of the HSF1 signaling directly contributes to suppression of HSPs in DDC exposed liver.  
204 Notably, the mRNA or protein levels of HSF1 were also suppressed by DDC(**Fig.2I-2J**,  
205 **Supplementary Fig.3**) suggesting that there is ongoing deregulation of the proteostasis signaling  
206 pathway in DDC diet-fed liver. Interestingly, refeeding regular diet to DDC fed mice recovered  
207 the expression of the HSF1 and HSPs(**Supplementary Fig.4**) suggesting that the suppression of  
208 molecular chaperinins and HSF1 is temporarily and reversible.Thus acute DDC can suppress the  
209 protein molecular chaperone system, and contribute to the formation of p62-Ub-IHBs.  
210 Furthermore,the downregulation of these proteostasis factors could be one possible contributing  
211 factor to selective protein accumulation.

212

### 213 **3. Autophagy flux is impaired by an acute DDC diet.**

214 Hepatic IHBs formation could also be due to impaired clearance of the protein aggregates such  
215 as by autophagy or ubiquitin-proteasome degradation pathways[22-24]. Hepatocytes have active  
216 autophagy even at basal level and can utilize to counteract the proteotoxicity. Moreover, p62  
217 protein which is one of the selective autophagic substrates, accumulates in the DDC exposed  
218 liver(**Fig.1D-1F**), Whether DDC diet-mediated IHBs formation is due to impaired hepatic  
219 autophagy is less clear. So, we next determined the autophagy status in DDC or regular diet fed  
220 mice by examining the level of autophagy-specific marker-LC3-I and LC3-II.  
221 Immunofluorescence staining for LC3 protein showed increased LC3 positive autophagic  
222 puntaes in DDC fed mice(**Fig.3A, Supplementary Fig.5A**). Western blot analysis also showed  
223 the elevated hepatic LC3-II protein levels in DDC fed liver compared to their regular diet fed  
224 wild type (**Supplementary Fig.5B**). Examination of p62, an autophagic substrate by  
225 immunofluorescence staining showed co-localization of LC3 with p62 autophagic  
226 substrate(**Fig.3A**), suggeting that hepatic autophagic function is altered with the DDC diet.

227 Increased hepatic LC3-II protein level and elevated intracellular autophagic punctae could be  
228 either due to autophagy induction or due to impaired fusion of autophagosomes with the  
229 lysosomes[25]. To rule out these possibilities, we performed autophagic-flux in DDC-fed mice.  
230 The DDC diet-fed mice were injected with chloroquine(CQ), and an autophagic flux  
231 inhibitor(**Fig.3B**). Immunoblotting showed increased LC3-II level in DDC exposed liver but  
232 there were no further increase in the LC3-II protein level in presence of CQ(**Fig.3C-**  
233 **3D**).Furthermore the extent of elevation of p62 (HMW or normal molecular weight) levels were  
234 similar between CQ treated or not treated DDC exposed liver(**Fig.3C-3D**). These results indicate  
235 that that increased autophagosome punctae is not because of autophagy induction rather due to  
236 DDC mediated impairment of fusion of autophagosomes with the lysosomes. Overall these data  
237 indicate that hepatic IHBs formation (protein accumulation) is not only due to the  
238 downregulation of the HSF1 and HSPs signaling network but also due to the impaired clearance  
239 of IHBs by autophagy. Whether and how these two cellular events are mechanistically linked or  
240 not is unclear.

241

#### 242 **4. Impaired autophagic flux is not due to endoplasmic reticulum (ER) stress signaling.**

243 The DDC diet causes impaired hepatic autophagy by blocking the fusion of autophagosomes  
244 with the lysosomes and preventing the degradation of p62-Ub IHBs(**Fig.3A-3D**).Autophagic flux  
245 impairment is observed during xenobiotic stress such as during thapsigargin treatment and high  
246 fat-fed conditions [26-28]. Thapsigargin treatment induces ER stress by inhibiting  
247 sarcoendoplasmic reticulum calcium transport ATPase (SERCA) and blocks autophagosome-  
248 lysosome fusion[26]. Similarly, free fatty acid (FFA) from a high-fat diet induces ER stress,  
249 inhibits SERCA activity- increasing cytosolic calcium in hepatocytes that lead to the inhibition  
250 of autophagic function primarily by blocking the fusion step[28]. ER stress could also be  
251 activated in response to protein misfolding and aggregate formation in the DDC diet[3].

252 So we next asked whether the DDC induces ER stress and ER stress-mediated elevation of  
253 cytosolic Ca<sup>2+</sup> responsible for the hepatic autophagic flux impairment. We examined the status  
254 of various ER stress markers in the DDC diet exposed liver. Misfolded protein accumulation  
255 leads to the activation of three constitutive client proteins PKR-like endoplasmic reticulum  
256 kinase (PERK), inositol requiring enzyme-1 (IRE1), and activating transcription factor 6

257 (ATF6)) that serve as upstream activators of co-ordinated signal transduction known as unfolded  
258 protein response(UPR)[29]. Examination of various signaling proteins concerning the PERK  
259 pathway(eIF2a, CHOP, GADD34), ATF6 pathway( ATG6-p90, ATG6-p50, and IREa pathway (  
260 XBP-spliced, XBP-unspliced, IREFa) did not show any remarkable upregulation of these  
261 proteins level in DDC exposed liver lysate. Instead, expression level of these proteins were  
262 downregulated(**Fig.4A**). The mRNA expression level of XBP or chop were also significantly  
263 downregulated in DDC exposed liver(**Fig.4B**). Interestingly the suppression of these ER stress  
264 proteins appears reversible as the refeeding regular diet after 2-weeks of DDC exposure elevated  
265 their mRNA expression than the basal expression level(**Fig.4B**). Thus, ER stress is not activated  
266 but rather suppressed by the DDC diet. These results suggests that ER-stress is unlikely to  
267 mechanistically explain the observed autophagicflux impairment in the DDC exposed liver.

268

## 269 **5. Impaired autophagic flux is correlated to the downregulation of Rab proteins.**

270 Autophagic degradation involves the vesicular formation, transport, tethering, and fusion[30].  
271 Autophagic flux particularly involved the fusion of autophagosomes with the lysosome to  
272 degrade the enclosed contents including protein aggregates. The Rab protein is a small GTPase  
273 that belongs to the Ras-like GTPase superfamily and shuttles between GTP-bound active state  
274 and GDP-bound inactive state to have central role in vesicular trafficking[31]. Since autophagy  
275 involves series of vesicular trafficking events, Rab small GTPases have been found to participate  
276 in the autophagic process[32]. Numerous Rab proteins such as Rab1, Rab5, Rab7, rab9A,  
277 Rab11, Rab23, Rab32, and Rab33B participates in autophagosomes[30]. The Rab7 has been  
278 particularly shown to be involved in the fusion of autophagosomes to lysosomes[33-36]. So, we  
279 next examined whether deregulation of Rab GTPases could be related to impaired autophagic  
280 flux in DDC exposed liver. We determined the expression level of the Rab genes in the DDC  
281 diet-fed liver and compared to regular diet-fed liver. We identified 59 Rab genes expressed in  
282 rodents at a detectable level and selected 36 of these Rabs for quantitative PCR analysis. We  
283 particularly focused on the Rabs which are known to be either expressed in the liver or  
284 implicated in autophagy. Gene expression analysis showed a general downregulation of Rab  
285 genes in DDC diet exposed liver(**Fig.5A**). We verified this observation by examining the protein  
286 expression level of a few selected Rabs and Rab-associated proteins such as Rabex5,

287 Rabenosyn5, and Spartin . Immunoblotting analysis showed significant downregulation of  
288 protein levels of Rab4, Rab5, Rab7, Rab11, Rabex5, Rabenosyn5, and Spartin in the DDC diet  
289 exposed liver(**Fig.5B-5C**). These data suggest that suppression of Rab GTPase expression and  
290 function impairs autophagic flux and causes qualitative changes in the hepatic proteome of DDC  
291 exposed liver.

## 292 **6. Impaired hepatic autophagy exacerbates DDC induced cholestatic liver injury.**

293 The above observation led us to examine whether autophagy impairment due to DDC exposure  
294 can exacerbate p62-IHB accumulation to aggravate cholestatic liver injury.DDC diet was fed to  
295 Atg7<sup>+/-</sup> mice for 2 weeks. Atg7 is an important autophagy-related gene required for the  
296 formation of autophagosomes[2]. We choose hepatocyte specific Atg7<sup>+/-</sup> in place of Atg7<sup>-/-</sup>  
297 mice for DDC treatment because Atg7<sup>-/-</sup> develop cholestatic liver injury on its own[37-39]. The  
298 gross examination revealed enlarged and dark brown livers DDC exposed Atg7<sup>+/-</sup> similar to its  
299 wild type counterpart (**Fig.6A**).Interestingly, DDC-mediated hepatomegaly was further  
300 exacerbated in the Atg7<sup>+/-</sup> liver(**Fig.6B**). More importantly, the DDC exacerbated the cholestatic  
301 liver injury as examined by serum ALT, ALP, TBA, TB, DB in Atg7<sup>+/-</sup> mice(**Fig.6C**,  
302 **Supplementary Fig.6A**).General histological and immunohistochemistry examination also  
303 presented increased immune cells infiltration, and ductular reaction in Atg7<sup>+/-</sup> mice when  
304 compared to DDC fed wild type mice(**Fig.6D**, **Supplementary Fig.6B**). Moreover, examination  
305 of p62 and IHB related proteins showed furthermore accumulation of IHBs related proteins in  
306 DDC fed Atg7<sup>+/-</sup> mice(**Fig.6E**).Immunofluorescence staining for K8/K18 protein showed linear  
307 distinct, bright filamentous staining pattern that runs along the cell periphery in Atg7<sup>+/-</sup>  
308 mice(**Fig.6F**). This K8/K18 immunostaining pattern is distinctly different when compared to  
309 diffused staining pattern of DDC exposed wild type liver(**Fig.6F**).Thus genetic impairment of  
310 autophagy function exacerbates DDC induced cholestatic liver injury.

## 311 **7. DDC-mediated autophagy impairment activates p62-NRF2 and mTORC1 signaling but** 312 **not the NF-κB pathway.**

313 Hepatic autophagy impairment due to DDC exposure cause accumulation of p62(**Fig.1D,1E, 1F**,  
314 **1H**). It is well established that hepatic p62 not only acts as an autophagy substrate but can  
315 functions as a signaling hub[40]. The p62 is a stress-inducible and multifunctional protein that  
316 contains several protein-protein interaction domains-a Phox1 and Bem1p (PB1) domain, a zinc

317 finger (ZZ), two nuclear localization signals (NLSs), a TRAF6 binding (TB) domain, a nuclear  
318 export signal (NES), and LC3-interacting region (LIR), a Keap1-interacting region (KIR), and a  
319 ubiquitin-associated (UBA) domain[41, 42]. These p62's protein domains can interact with  
320 various binding partners to activate downstream signaling pathways and may play a pathogenic  
321 role in DDC exposed liver. We next examined the potential signaling pathways specifically  
322 nuclear factor kappa B(NF-kB), mammalian target of rapamycin complex 1 (mTORC1), and  
323 NRF2 signaling pathways that could have pathological impact in DDC exposed liver.

324 P62 regulates NF-kB by interacting with aPKC through its PB1 domain, RIP through its ZZ  
325 domain, and TRAF6 through its TB domain [43]. As such, the p62 protein interacts with RIP and  
326 bridges RIP to aPKCs, resulting in the activation of NF-kB by the TNFa signaling pathway [44].  
327 Interestingly, the expression level of TNFa has been reported to be elevated in DDC conditions  
328 [9]. Hence, NF-kB pathway could be activated, as a minor inflammatory response in DDC  
329 exposed liver. So, we examine whether the accumulation of p62 in DDC causes activation of the  
330 NF-kB inflammatory signaling pathway. Immunoblot analysis showed a lower level of p65/NF-  
331 kB protein in DDC diet-fed mice (**Fig.7A**). the mRNA expression analysis for NF-kB  
332 downstream target genes such as c-Rel, Cox2, Rel B, or NF-kBIZ were also significantly  
333 downregulation(**Fig. 7B**) suggesting that the NF-kB pathway is not activated rather suppressed  
334 with an acute DDC exposure.

335 P62 can also promote mTORC1 activation by directly interacting with Raptor, a key component  
336 of mTORC1 [45]. The region between the ZZ and TB domains (amino acids 167–230) of p62 is  
337 required for the interaction between p62 and Raptor [45]. Moreover, over-expression of p62  
338 enhanced mTORC1 activation [45]. Immunoblot analysis of mTORC1 downstream target  
339 protein showed elevated levels of phosphorylated-4E-BP(**Fig. 7C**) suggesting that p62  
340 accumulation can activate the mTORC1 pathway in the DDC diet. The activation of the  
341 mTORC1 pathway could further suppress autophagy causing a vicious cycle of autophagic  
342 suppression.

343 Accumulation of p62 can also activate NRF2 by a non-canonical pathway [46, 47]. The p62  
344 protein competitively binds to Kelch-like-ECH-associated protein 1 (KEAP1), an adaptor  
345 component for Cullin3-based E3 ubiquitin ligase complex that ubiquitinates NRF2 for  
346 proteasomal degradation. Moreover, NRF2 is an anti-oxidative stress-activated transcription

347 bZIP factor, that can promote the transcriptional expression of K8/K18 expression[13].On the  
348 other hand, DDC-mediated inhibition of ferrochelatase causes accumulation of PP-IV that can  
349 cause oxidative stress [48] and hence could activate NRF2. So we next analyzed the expression  
350 level of NRF's downstream target Protein NQO1 in DDC exposed liver.Immunoblot analysis  
351 showed marked elevation of NQO1 in DDC exposed liver (**Fig. 7D**). Activation of NRF2  
352 transcription factor cause nucleus translocation where it binds to the anti-oxidative response  
353 element present in the promoter region of a battery of anti-oxidative response genes such as  
354 NQO1, HO-1, and Gstm1. Quantitative PCR analysis showed that NRF2 downstream target  
355 genes NQO1, HO-1, and Gstm1 also significantly upregulated in DDC exposed liver. (**Fig. 7E**).  
356 Notably, the NRF2 mRNA expression did not change, suggesting that NRF2 protein  
357 accumulation and its activation is via non-canonical p62 accumulation as observed in the DDC  
358 diet exposed liver. Overall these results clearly suggest that accumulation of p62 due to  
359 autophagy impairment in DDC diet leads to activation of NRF2 and mTORC1 signaling  
360 pathway. The NF-kB signaling pathway is not activated, but rather suppressed in the liver  
361 treated with a DDC.

362

### 363 **8. Impaired autophagy by DDC is associated with suppression of hepatic FXR signaling** 364 **and deregulated bile acid (BA) metabolism.**

365 Our previous study shows that autophagy-deficiency in hepatocyte deregulated BA metabolism  
366 resulting in an intracellular cholestasis with increased levels of serum and hepatic BA level[37].  
367 Autophagy-deficiency causes the accumulation of p62, activating the non-canonical NRF2  
368 pathway which then transcriptionally represses the expression of FXR nuclear receptor, a master  
369 regulator of hepatic BA metabolism [37]. It is well established that DDC exposed liver displays  
370 BA metabolic disturbance and intrahepatic cholestasis by an unclear mechanism [9]. Since DDC  
371 impairs hepatic autophagy and activates the NRF2 signaling, we next examined whether  
372 activated NRF2 in DDC could also relate to FXR downregulation together with other  
373 abnormalities related to BA metabolism.

374 There was a marked decrease in the FXR protein level in the DDC exposed liver compared to  
375 wild type control liver(**Fig.8A**). The mRNA level of FXR and its downstream target genes- SHP,  
376 BSEP, Osta were also significantly downregulated(**Fig.8B**). However. mRNA expression level

377 of RXRa, which is a binding partner of FXR did not show significant changes in the DDC  
378 exposed liver(**Fig.8B**). Additionally, serum levels of Total Bile acid(TBA), cholesterol,  
379 triglyceride, Total Bilirubin, Direct bilirubin, and liver injury markers-ALT and ALP were  
380 dramatically upregulated reflecting the ongoing cholestatic liver injury in the DDC exposed mice  
381 (**Fig.8C, Supplementary Fig.7A-7B**). Interestingly the cholestatic liver injury parameters were  
382 partially recovered with prolonged DDC exposure suggesting the development of a  
383 compensatory resistance mechanism in the liver(**Fig.8C, Supplementary Fig.7A-7B**).  
384 Expression analysis of various BA transporters showed elevation of Apical (MDR1A, MDR1B)  
385 and systemic (Ostb, Mrp3, Mrp4) BA transporters. The expression levels of basolateral or  
386 enterohepatic ( NTCP, OATP2, OATP1, and OATP4) BA transporters were  
387 suppressed(**Supplementary Fig.8**) indicating the compensatory adaptation in responses to  
388 cholestasis. Taken together, these results suggest that DDC causes downregulation of FXR  
389 nuclear receptors and cholestatic liver injury. DDC diet-activated p62-Nrf2 signaling pathway  
390 may suppress FXR and cause cholestatic liver injury.

391

## 392 **DISCUSSION**

393 **A. Role of Autophagy in acute DDC associated IHBs formation.** Hepatocyte protein  
394 aggregates, including MDBs, are usually seen in hepatocellular carcinoma, Wilson's disease,  
395 non-alcoholic steatohepatitis, and several other chronic liver disorders. MDBs are primarily  
396 composed of K8/18 as well as p62, Ub, and chaperones[12, 36]. IHBs contain p62 and ubiquitin  
397 (although not constantly) but differ from MDBs by lacking K8/K18[5]. Incorporating  
398 "abnormal" keratins and HSPs into aggregated p62 causes p62-containing IHBs to become  
399 classical MDBs [5, 22]. MDBs can be experimentally induced in the livers of mice chronically  
400 fed DDC[5]. The cellular status of these established MDB proteins is less clear in the acute  
401 model of DDC intoxication. We show that an acute DDC exposed liver has an increased Ub and  
402 p62 positive protein aggregates, as seen in autophagy-deficient livers(**Fig.1D-1F, 1H**)[39]. The  
403 p62 aggregate formation could be caused by impaired autophagy  
404 clearance. Autophagic degradation is involved in the disposal of aggregated proteins. The DDC  
405 diet suppressed autophagic activity and thus compromised the clearance of IHBs. As a result of  
406 inadequate protein degradation via autophagy, IHBs accumulate.

407 Various HSPs that are involved in regulating protein conformation is significantly decreased in  
408 the liver of DDC intoxicated mice (**Fig.2A-2J**). Thus, despite elevated K8/K18 protein levels  
409 and p62-Ub-containing IHBs, MDBs were not formed in acute DDC intoxicated livers. The lack  
410 of MDB formation at the early stages of DDC intoxication could be due to HSPs  
411 downregulation. What causes the downregulation of so many HSPs in the liver of DDC diet-  
412 exposed mice is unclear. However, in situ promoter analysis with MatInspector and JASPER  
413 revealed the presence of putative anti-oxidative response element (ARE) binding site to NRF2 in  
414 HSF1, the master regulator of the expression of HSPs (Katherine B et al unpublished data). One  
415 possible explanation would be the activation of NRF2 could suppress HSF1 and therefore  
416 downregulate HSPs (**Fig.9**)

417 **B. Role of Rabs in autophagy flux impairment.** The Rab proteins are members of the Ras  
418 superfamily of small G proteins. They function as regulators of vesicular traffic by switching  
419 between GTP-bound and GDP-bound conformations. Rab bound to GDP is inactive, whereas  
420 Rab bound to GTP is active. GDP/GTP exchange factors (GEPs), GDP dissociation inhibitors  
421 (GDIs), and GTPase-activating proteins (GAPs) regulate the conversion from one state to  
422 another. Rab proteins are found in distinct subcellular locations. The Rab7 is present in  
423 autophagosomes and [21, 36] promotes microtubule plus-end-directed transport and fusion of  
424 autophagosomes with lysosomes through a novel FYVE and coiled-coil domain-containing  
425 protein FYCO1[20]. Rab7 is also involved in the maturation of late autophagic vacuoles,  
426 recruitment of dynein/dynactin motors, Rabring7 (Rab7-interacting ring finger protein), and the  
427 hVPS34/p150 complex[36]. Decreased expression of Rab proteins could mechanistically explain  
428 why DDC impairs autophagosomes and lysosomal fusion. Since Rab proteins are also localized  
429 to the conventional secretory pathway, DDC may compromise the hepatic conventional secretory  
430 pathway.

431 It is unclear why the DDC diet causes massive repression of Rab proteins. There is a possibility  
432 that DDC suppresses upstream regulators of Rab expression. Alternatively, DDC-related  
433 metabolites generated in the liver may inhibit Rab expression. DDC N-alkylates the heme of  
434 certain hepatic cytochrome-p450 enzymes to produce N-methyl protoporphyrin (NMPP). NMPP  
435 is a potent inhibitor of ferrochelatase which is involved in the conversion of PP-IX into heme,  
436 thus resulting in the accumulation of PP-IX and upstream porphyrin intermediates[37]. The



437 accumulation of NMPP or PP-IX could be responsible for the downregulation of Rab proteins. A  
438 future study will examine the common motifs present in the promoters of the Rab genes and the  
439 transcription factor that regulates their expression.

440 **C. Autophagy regulates hepatic xenobiotic metabolism by modulating the p62-NRF2-FXR**

441 **signaling.** A xenobiotic like DDC may interfere with cell survival mechanisms such as  
442 autophagy. Our results indicate that the acute DDC exposure impairs fusion of autophagosome  
443 with lysosome causing p62 accumulation and IHB formation. It is unclear how exactly this  
444 fusion of autophagosome and lysosome is impaired by DDC. However, this study support our  
445 previous study showing that autophagy regulates signaling proteins such as p62 and NRF2[35,  
446 36]. Autophagy is necessary for maintaining FXR functionality, and a deficiency of autophagy  
447 suppressed its expression via NRF2 activation. The accumulation of p62 in the autophagy-  
448 deficient liver causes NRF2 activation and FXR repression, resulting in cholestatic liver  
449 injury[37]. We confirm the pathological significance of the p62-NRF2-FXR signaling axis in the  
450 DDC model of xenobiotic-induced liver injury. As an alternative, DDC can cause oxidative  
451 stress, resulting in the oxidation of cysteine residues in KEAP1, which then activates NRF2 via  
452 conventional pathway[49]. DDC feeding may also inhibit NRF2 proteasomal degradation, most  
453 likely through PpIX-mediated oxidative stress[37, 38].

454 Moreover, the role of autophagy in xenobiotic-induced liver injury is unclear. Our data strongly  
455 suggest that mice with impaired autophagy such as Atg7<sup>+/-</sup> mice are more susceptible to DDC-  
456 induced liver injury than those fed the regular diet. The DDC diet injury is cholestatic since there  
457 is an elevation of serum total bile acid in DDC diet animals. This implies that autophagy function  
458 impairment could exacerbate the DDC diet injury, and activating autophagy may represent an  
459 effective therapeutic approach.

460

461 **FIGURE LEGENDS**

462 **Figure 1.** Hepatic proteins are altered qualitatively but not quantitatively by DDC. (A) Gross  
463 image of liver harvested from wild type mice fed with regular diet(RD) and 2 weeks of DDC  
464 diet. (B) Hepatic total protein level in 9-week-old mice wild type mice fed with RD and 2  
465 weeks of DDC diet. (C) Total liver lysates from 9-week-old mice were analyzed by CBB  
466 staining. Protein band intensities were quantified by densitometry. (D) Liver sections were  
467 stained for p62/SQSTM1 and Ubiquitin(Ub). Arrows indicate hepatocytes without aggregated  
468 p62 or Ub. Scale bars: 10  $\mu$ m. (E) Immunostained for p62 in primary hepatocytes isolated from  
469 9-week-old wild type mice fed with RD and 2 weeks of DDC diet. (F) Total liver lysates from 9-  
470 week-old mice were analyzed by immunoblotting for K8/18, p62, and GAPDH. (G) Quantitative  
471 PCR analysis for p62, K8, and K18 mRNA expression in 9-week-old mice wild type mice fed  
472 with RD and 2-4 weeks of DDC diet. The mRNA expression levels were normalized to actin.  
473 Data are expressed as the mean  $\pm$  SEM. n.s: not significant, \* $P \geq 0.05$ , \*\* $P \geq 0.01$ , \*\*\* $P \geq 0.001$   
474 (n=3). (H) Liver sections were co-stained for K8/K18 and p62. Arrows indicate hepatocytes  
475 without aggregated p62. Scale bars: 10  $\mu$ m.

476 **Figure 2. Liver protein chaperonin system is suppressed by DDC.** Quantitative PCR analysis  
477 for (A) Hsp40 (DnaJ) Family, (B) Hsp110 Family, (C) Hsp60 Family, (D) HSP90 Family, (E)  
478 HSP47 Family, (F) HSP10 (E) Family, (F) HSP70 Family, and (G) HSF1 mRNA expression in  
479 9-week-old mice wild type mice fed with regular diet(RD) and 2 weeks of DDC diet. The  
480 mRNA expression levels were normalized to actin. Data are expressed as the mean  $\pm$  SEM. n.s:  
481 not significant, \* $P \geq 0.05$ , \*\* $P \geq 0.01$ , \*\*\* $P \geq 0.001$  (n=3). (I-J) Total liver lysates from 9-week-old  
482 mice fed with RD and 2 weeks of DDC diet were analyzed by immunoblotting for HSF1 or  
483 ACTIN(I) and HSP90, HSP70, and GAPDH.

484 **Figure 3. Autophagy flux is impaired by DDC.** (A) Co-immunostained for p62 and LC3 in  
485 liver section prepared from wild type mice fed with regular diet(RD) and 2 weeks of DDC diet.  
486 The a, a', and a'' represents the enlarged images from the respective images from DDC diet fed  
487 wild type liver. Scale bars: 50  $\mu$ m. (B) Schematics of CQ administration to Regular diet(RD) or 2  
488 weeks of DDC diet fed wild type mice. (C) Total liver lysates were analyzed by immunoblotting  
489 for LC3, p62 and ACTIN. (D) Protein band intensities for LC3-II, high molecular  
490 weight(HMW) p62, and normal molecular weight p62 were quantified by densitometry. Protein

491 band intensity was normalized to ACTIN band intensity. Data are expressed as the mean  $\pm$   
492 SEM. n.s: not significant, \* $P \geq 0.05$ , \*\* $P \geq 0.01$  (n=2).

493 **Figure 4. Inhibition of autophagic flux by DDC diet is not triggered by ER stress.** (A) Total  
494 liver lysates were analyzed by immunoblotting for PERK Pathway(BIP, eIF2a, CHOP,  
495 GADD34, ACTIN), ATF6 pathway( ATF-p90, ATF-p50, ACTIN), and (IRF1a pathway( XBP-  
496 spliced, XBP-unspliced, ACTIN) proteins. (B) Quantitative PCR analysis for XBP-uncut, XBP  
497 spliced, and CHOP mRNA expression from wild type mice fed with regular diet(RD), 2-4  
498 weeks of DDC diet, and 2week DDC followed by RD. The mRNA expression levels were  
499 normalized to actin. Data are expressed as the mean  $\pm$  SEM. \* $P \geq 0.05$ , \*\* $P \geq 0.01$ ,  
500 \*\*\* $P \geq 0.001$ (n=3).

501 **Figure 5. Inhibition of autophagic flux by DDC diet may be due to the downregulation of**  
502 **Rab proteins.** (A) Quantitative PCR analysis for Rab family genes in mRNA expression in  
503 wild type mice fed with regular diet(RD), and 2 weeks of DDC diet. The mRNA expression  
504 levels were normalized to actin. Data are expressed as the mean  $\pm$  SEM. n.s: not significant,  
505 \* $P \geq 0.05$ , \*\* $P \geq 0.01$ , \*\*\* $P \geq 0.001$ (n=3). (B) Total liver lysates were analyzed by immunoblotting  
506 for RAB4, RAB5, RAB7, RAB11, RABEX5, RABENOSYN5, SPARTIN and GAPDH proteins.  
507 Protein band intensity was normalized to GAPDH band intensity. Data are expressed as the  
508 mean  $\pm$  SEM. n.s: not significant,\* $P \geq 0.05$ , \*\*\* $P \geq 0.001$  (n=2).

509 **Figure 6. Impaired hepatic autophagy exacerbates DDC mediated cholestatic liver injury.**  
510 (A) Representative gross morphology of liver of regular diet(RD) or DDC diet fed wild type  
511 mice and 2-week DDC diet fed Atg7<sup>+/-</sup> mice. (B) LW/BW ratio showing hepatomegaly in the 2  
512 weeks DDC diet fed wild type or Atg7<sup>+/-</sup> mice. (C) Serum ALT, ALP, total Bile Acid(TBA),  
513 Total bilirubin(TB), and direct bilirubin(DB) levels were quantified in the 2 weeks DDC diet fed  
514 wild type or Atg7<sup>+/-</sup> mice. Data are expressed as the mean  $\pm$  SEM. n.s: not significant, \*\* $P \geq 0.01$ ,  
515 \*\*\* $P \geq 0.0001$  (n=3). (D) Liver sections were subjected to H&E staining (original magnification,  
516  $\times 200$ ), and immunostained for CK19 to detect Ductular cells(original magnification,  $\times 200$ ).  
517 Scale bars: 50  $\mu$ m (CK19).(E) Total liver lysates were analyzed by immunoblotting for K8/18,  
518 p62, and GAPDH proteins in the 2 weeks DDC diet fed wild type or Atg7<sup>+/-</sup> mice. Protein band  
519 intensity was normalized to GAPDH band intensity. Data are expressed as the mean  $\pm$  SEM. n.s:

520 not significant, \* $P \geq 0.05$ , \*\*\* $P \geq 0.001$  (n=2). (F) Liver sections were co-stained for K8/K18 and  
521 p62. Scale bars: 10  $\mu\text{m}$ .

522 **Figure 7. Autophagy impairment is linked to activation of the NRF2 and mTORC1**  
523 **signaling pathways, not to the NF- $\kappa$ B signaling pathway.** (A) Total liver lysates were

524 analyzed by immunoblotting for p65/NF- $\kappa$ B and GAPDH proteins in wild type mice fed with  
525 regular diet(RD), and 2 weeks of DDC diet. (B) Quantitative PCR analysis for c-Rel, COX2,  
526 Rel-B and NF- $\kappa$ BIZ mRNA expression in wild type mice fed with RD, and 2-4 weeks of DDC  
527 diet. The mRNA expression levels were normalized to actin. Data are expressed as the mean  $\pm$   
528 SEM. n.s: not significant, \* $P \geq 0.05$ , \*\* $P \geq 0.01$ , n=3). (C-D) Total liver lysates were analyzed by  
529 immunoblotting for (C) phospho-4E-BP1, Total 4E-BP1, and ACTIN proteins and (D) NRF2,  
530 NQO1, and GAPDH in wild type mice fed with RD, and 2-4 weeks of DDC diet. (E)  
531 Quantitative PCR analysis for Nqo1, HO-1, Gstm1, and Nrf2 mRNA expression in wild type  
532 mice fed with RD, and 2-4 weeks of DDC diet. Data are expressed as the mean  $\pm$  SEM. n.s: not  
533 significant, \*\* $P \geq 0.01$ , \*\*\* $P \geq 0.0001$  (n=3).

534 **Figure 8. DDC repress hepatic FXR signaling and impairs bile acid handling.** (A) Total liver

535 lysates were analyzed by immunoblotting for FXR and GAPDH proteins in wild type mice fed  
536 with regular diet(RD), and 2-4 weeks of DDC diet. (B) Quantitative PCR analysis for FXR,  
537 SHP, BSEP, RXRa, and OSTa mRNA expression in wild type mice fed with RD, and 2-4 weeks  
538 of DDC diet. The mRNA expression levels were normalized to actin. Data are expressed as the  
539 mean  $\pm$  SEM. n.s: not significant, \* $P \geq 0.05$ , \*\* $P \geq 0.01$ , \*\*\* $P \geq 0.0001$ , (n=3). (C) Serum total Bile  
540 Acid(TBA), Cholesterol, ALT, and ALP levels were quantified for 9-week-old mice fed with  
541 RD, and 2-10 weeks of DDC diet. Data are expressed as the mean  $\pm$  SEM. n.s: not  
542 significant, \*\* $P \geq 0.01$ , \*\*\* $P \geq 0.0001$  (n=3).

543 **Figure 9. Schematic model showing role of autophagy in DDC diet.** Acute DDC impairs the

544 autophagic flux due to Rab suppression. Impaired autophagy leads to formation of p62  
545 containing intrahyaline bodies(IHB). Impaired autophagy can also relate to downregulation of  
546 hepatic protein chaperonin system, further aiding in IHB formation. Further activation of P62  
547 related NRF2 can suppress the FXR nuclear receptor and cause cholestatic liver injury.

548

549 **SUPPLEMENTARY FIGURES**

550 **Supplementary Figure 1. Hepatic IHB formation in DDC diet exposed liver.**(A) Liver  
551 sections were stained for K8 and K18. (B) Co-immunostaining for K8/K18 and p62 in liver  
552 section from liver section of regular diet or DDC diet fed wild type liver. Scale bars: 10  $\mu$ m

553 **Supplementary Figure 2. HSPs are downregulated regardless of subcellular localization.**

554 (A) Quantitative PCR analysis for mRNA expression of HSP's localized to endoplasmic  
555 reticulum(ER), nuclear membrane, vesicles, cytoplasm, nucleoplasm, ER that belongs to Hsp40  
556 (DnaJ) Family, Hsp110 Family, HSP90 Family, or HSP47 Family. The cDNA was prepared  
557 from mRNA isolated from 9-week-old mice wild type mice fed with regular diet(RD) and 2  
558 weeks of DDC diet.The mRNA expression levels were normalized to actin. Data are expressed  
559 as the mean  $\pm$  SEM. n.s: not significant, \* $P \geq 0.05$ , \*\* $P \geq 0.01$ , \*\*\* $P \geq 0.001$  (n=3)

560 **Supplementary Figure 3. HSF1 and HSP's remain suppressed in longer DDC fed liver.**

561 Quantitative PCR analysis for HSF1,HSP90B1, and HSPA4 mRNA expression from 9-week-old  
562 mice wild type mice fed with regular diet(RD) or 2-6 weeks of DDC diet.The mRNA  
563 expression levels were normalized to actin. Data are expressed as the mean  $\pm$  SEM. \* $P \geq 0.05$ ,  
564 \*\* $P \geq 0.01$ ,(n=3).

565 **Supplementary Figure 4. Hepatic suppression of HSF1 and HSP is reversible.** (A)

566 Schematics of DDC diet recovery experimental model.(B) Quantitative PCR analysis for HSF1,  
567 HSP90B1,CCT8,HSPA4 and HSPA5 mRNA expression from 8-week-old mice wild type mice  
568 fed with either 4 weeks of DDC or 2 weeks DDC diet followed by 2 weeks Regular Diet(RD)  
569 The mRNA expression levels were normalized to actin. Data are expressed as the mean  $\pm$  SEM.  
570 n.s: not significant, \* $P \geq 0.05$ , \*\* $P \geq 0.01$ ,(n=3).

571 **Supplementary Figure 5. Autophagy markers are elevated in DDC diet exposed liver.** (A)

572 Autophagosomes detection by LC3 Immunostaining in liver section prepared from wild type  
573 mice fed with regular diet(RD) and 2 weeks of DDC diet. Scale bars: 10  $\mu$ m. (B) Total liver  
574 lysates prepared from RD or 2-4 weeks of DDC diet fed wild type mice, were analyzed by  
575 immunoblotting for LC3, and GAPDH.

576 **Supplementary Figure 6. Cholestasis related parameters analysis in DDC diet exposed**

577 **mice.** (A) Serum total cholesterol(TC), and triglyceride levels were quantified in the 2 weeks

578 DDC diet fed wild type or Atg7<sup>+/-</sup> mice. Data are expressed as the mean  $\pm$  SEM. n.s: not  
579 significant, \*\*P $\geq$ 0.01, \*\*\*P $\geq$ 0.0001 (n=3). (B) Liver sections were subjected to H&E staining  
580 (original magnification, 100X and  $\times$ 200).

581 **Supplementary Figure 7. DDC cause hepatomegaly and cholestatic liver injury.** (A)  
582 LW/BW ratio showing hepatomegaly in the DDC diet fed wild type mice for different time  
583 period.(B) Serum total bilirubin, Direct bilirubin and triglyceride levels were quantified for 9-  
584 week-old mice fed with regular diet(RD), and 2-10 weeks of DDC diet. Data are expressed as the  
585 mean  $\pm$  SEM. n.s: not significant, \*\*P $\geq$ 0.01, \*\*\*P $\geq$ 0.0001 (n=3).

586 **Supplementary Figure 8. Adaptation alteration in cholestasis associated bile transporters**  
587 **in DDC diet.** Quantitative PCR analysis for Apical Bile acid transporters(MRP2, MDR1A,  
588 MDR1B), Systemic BA transporters( OSTb, MRP3, and MRP4), and Basolateral/Enterohepatic  
589 BA transporters( NTCP, OATP2, OATP1, and OATP4) mRNA expression in wild type mice fed  
590 with regular diet(RD), and 2-4 weeks of DDC diet. The mRNA expression levels were  
591 normalized to actin. Data are expressed as the mean  $\pm$  SEM. n.s: not significant, \*P $\geq$ 0.05,  
592 \*\*P $\geq$ 0.01, \*\*\*P $\geq$ 0.0001,(n=3).

593 **Acknowledgments**

594 We acknowledge the support of This study was supported in part by the Louisiana Board  
595 of Regent(BK),BeHEARD Rare disease(BK) , ASIP/SROPP(BK),and Tulane School of  
596 Medicine startup fund(BK) and NIH/NIDDKD grants R01 DK116605 (XMY).We also thank the  
597 support of the Tulane University Histology section at the TUSOM Department of Pathology and  
598 Laboratory Medicine for liver tissue sample processing, general histological staining, and  
599 providing unstained slides. We thank all members of Dr. Khambu's and Dr.Yin's laboratory for  
600 critical discussion about the xenobiotic metabolism and hepatic autophagy.

601

602

603

604 **REFERENCES**

- 605 1. Khambu, B., et al., *Homeostatic Role of Autophagy in Hepatocytes*. *Semin Liver Dis*, 2018. **38**(4):  
606 p. 308-319.
- 607 2. Khambu, B., et al., *Autophagy in non-alcoholic fatty liver disease and alcoholic liver disease*. *Liver*  
608 *Res*, 2018. **2**(3): p. 112-119.
- 609 3. Lafleur, M.A., J.L. Stevens, and J.W. Lawrence, *Xenobiotic perturbation of ER stress and the*  
610 *unfolded protein response*. *Toxicol Pathol*, 2013. **41**(2): p. 235-62.
- 611 4. Pose, E., P. Sancho-Bru, and M. Coll, *3,5-Diethoxycarbonyl-1,4-Dihydrocollidine Diet: A Rodent*  
612 *Model in Cholestasis Research*. *Methods Mol Biol*, 2019. **1981**: p. 249-257.
- 613 5. Yokoo, H., et al., *Experimental production of Mallory bodies in mice by diet containing 3,5-*  
614 *diethoxycarbonyl-1,4-dihydrocollidine*. *Gastroenterology*, 1982. **83**(1 Pt 1): p. 109-13.
- 615 6. Fickert, P., et al., *A new xenobiotic-induced mouse model of sclerosing cholangitis and biliary*  
616 *fibrosis*. *Am J Pathol*, 2007. **171**(2): p. 525-36.
- 617 7. Saggi, H., et al., *Loss of hepatocyte  $\beta$ -catenin protects mice from experimental porphyria-*  
618 *associated liver injury*. *J Hepatol*, 2019. **70**(1): p. 108-117.
- 619 8. Mariotti, V., et al., *Animal models of cholestasis: An update on inflammatory cholangiopathies*.  
620 *Biochim Biophys Acta Mol Basis Dis*, 2019. **1865**(5): p. 954-964.
- 621 9. Fickert, P., et al., *A new xenobiotic-induced mouse model of sclerosing cholangitis and biliary*  
622 *fibrosis*. *Am J Pathol*, 2007. **171**(2): p. 525-36.
- 623 10. Khambu, B., et al., *HMGB1 promotes ductular reaction and tumorigenesis in autophagy-deficient*  
624 *livers*. *J Clin Invest*, 2018. **128**(6): p. 2419-2435.
- 625 11. Khambu, B., et al., *The HMGB1-RAGE axis modulates the growth of autophagy-deficient hepatic*  
626 *tumors*. *Cell Death Dis*, 2020. **11**(5): p. 333.
- 627 12. De Feo, P. and P. Lucidi, *Liver protein synthesis in physiology and in disease states*. *Curr Opin Clin*  
628 *Nutr Metab Care*, 2002. **5**(1): p. 47-50.
- 629 13. Singla, A., et al., *Oxidative stress, Nrf2 and keratin up-regulation associate with Mallory-Denk*  
630 *body formation in mouse erythropoietic protoporphyria*. *Hepatology*, 2012. **56**(1): p. 322-31.
- 631 14. Zatloukal, K., et al., *From Mallory to Mallory-Denk bodies: what, how and why?* *Exp Cell Res*,  
632 2007. **313**(10): p. 2033-49.
- 633 15. Stumptner, C., et al., *Analysis of intracytoplasmic hyaline bodies in a hepatocellular carcinoma.*  
634 *Demonstration of p62 as major constituent*. *Am J Pathol*, 1999. **154**(6): p. 1701-10.
- 635 16. Nollen, E.A. and R.I. Morimoto, *Chaperoning signaling pathways: molecular chaperones as*  
636 *stress-sensing 'heat shock' proteins*. *J Cell Sci*, 2002. **115**(Pt 14): p. 2809-16.
- 637 17. Douglas, P.M., D.W. Summers, and D.M. Cyr, *Molecular chaperones antagonize proteotoxicity by*  
638 *differentially modulating protein aggregation pathways*. *Prion*, 2009. **3**(2): p. 51-8.
- 639 18. Janig, E., et al., *Interaction of stress proteins with misfolded keratins*. *Eur J Cell Biol*, 2005. **84**(2-  
640 3): p. 329-39.
- 641 19. Muchowski, P.J. and J.L. Wacker, *Modulation of neurodegeneration by molecular chaperones*.  
642 *Nat Rev Neurosci*, 2005. **6**(1): p. 11-22.
- 643 20. Ahn, S.G., et al., *Heat-shock cognate 70 is required for the activation of heat-shock factor 1 in*  
644 *mammalian cells*. *Biochem J*, 2005. **392**(Pt 1): p. 145-52.
- 645 21. Anckar, J. and L. Sistonen, *Regulation of HSF1 function in the heat stress response: implications*  
646 *in aging and disease*. *Annu Rev Biochem*, 2011. **80**: p. 1089-115.
- 647 22. Bence, N.F., R.M. Sampat, and R.R. Kopito, *Impairment of the ubiquitin-proteasome system by*  
648 *protein aggregation*. *Science*, 2001. **292**(5521): p. 1552-5.
- 649 23. Lu, K., F. den Brave, and S. Jentsch, *Pathway choice between proteasomal and autophagic*  
650 *degradation*. *Autophagy*, 2017. **13**(10): p. 1799-1800.



- 651 24. Tan, S. and E. Wong, *Kinetics of Protein Aggregates Disposal by Aggrephagy*. *Methods Enzymol*,  
652 2017. **588**: p. 245-281.
- 653 25. Klionsky, D.J., et al., *Guidelines for the use and interpretation of assays for monitoring autophagy*  
654 *(4th edition)(1)*. *Autophagy*, 2021. **17**(1): p. 1-382.
- 655 26. Ganley, I.G., et al., *Distinct autophagosomal-lysosomal fusion mechanism revealed by*  
656 *thapsigargin-induced autophagy arrest*. *Mol Cell*, 2011. **42**(6): p. 731-43.
- 657 27. Hernández-Cáceres, M.P., et al., *Palmitic acid reduces the autophagic flux in hypothalamic*  
658 *neurons by impairing autophagosome-lysosome fusion and endolysosomal dynamics*. *Mol Cell*  
659 *Oncol*, 2020. **7**(5): p. 1789418.
- 660 28. Park, H.W., et al., *Pharmacological correction of obesity-induced autophagy arrest using calcium*  
661 *channel blockers*. *Nat Commun*, 2014. **5**: p. 4834.
- 662 29. Szegezdi, E., et al., *Mediators of endoplasmic reticulum stress-induced apoptosis*. *EMBO Rep*,  
663 2006. **7**(9): p. 880-5.
- 664 30. Ao, X., L. Zou, and Y. Wu, *Regulation of autophagy by the Rab GTPase network*. *Cell Death Differ*,  
665 2014. **21**(3): p. 348-58.
- 666 31. Pankiv, S., et al., *FYCO1 is a Rab7 effector that binds to LC3 and PI3P to mediate microtubule plus*  
667 *end-directed vesicle transport*. *J Cell Biol*, 2010. **188**(2): p. 253-69.
- 668 32. Chua, C.E., B.Q. Gan, and B.L. Tang, *Involvement of members of the Rab family and related small*  
669 *GTPases in autophagosome formation and maturation*. *Cell Mol Life Sci*, 2011. **68**(20): p. 3349-  
670 58.
- 671 33. Schroeder, B., et al., *The small GTPase Rab7 as a central regulator of hepatocellular lipophagy*.  
672 *Hepatology*, 2015. **61**(6): p. 1896-907.
- 673 34. Manley, S., et al., *Suppression of autophagic flux by bile acids in hepatocytes*. *Toxicol Sci*, 2014.  
674 **137**(2): p. 478-90.
- 675 35. Morgan, N.E., M.B. Cutrona, and J.C. Simpson, *Multitasking Rab Proteins in Autophagy and*  
676 *Membrane Trafficking: A Focus on Rab33b*. *Int J Mol Sci*, 2019. **20**(16).
- 677 36. Talaber, G., et al., *HRES-1/Rab4 promotes the formation of LC3(+) autophagosomes and the*  
678 *accumulation of mitochondria during autophagy*. *PLoS One*, 2014. **9**(1): p. e84392.
- 679 37. Khambu, B., et al., *Hepatic Autophagy Deficiency Compromises Farnesoid X Receptor*  
680 *Functionality and Causes Cholestatic Injury*. *Hepatology*, 2019. **69**(5): p. 2196-2213.
- 681 38. Ni, H.M., et al., *Nrf2 promotes the development of fibrosis and tumorigenesis in mice with*  
682 *defective hepatic autophagy*. *J Hepatol*, 2014. **61**(3): p. 617-25.
- 683 39. Komatsu, M., et al., *Homeostatic levels of p62 control cytoplasmic inclusion body formation in*  
684 *autophagy-deficient mice*. *Cell*, 2007. **131**(6): p. 1149-63.
- 685 40. Katsuragi, Y., Y. Ichimura, and M. Komatsu, *p62/SQSTM1 functions as a signaling hub and an*  
686 *autophagy adaptor*. *Febs j*, 2015. **282**(24): p. 4672-8.
- 687 41. Sanchez-Martin, P. and M. Komatsu, *p62/SQSTM1 - steering the cell through health and disease*.  
688 *J Cell Sci*, 2018. **131**(21).
- 689 42. Manley, S., J.A. Williams, and W.X. Ding, *Role of p62/SQSTM1 in liver physiology and*  
690 *pathogenesis*. *Exp Biol Med (Maywood)*, 2013. **238**(5): p. 525-38.
- 691 43. Moscat, J. and M.T. Diaz-Meco, *p62: a versatile multitasker takes on cancer*. *Trends Biochem Sci*,  
692 2012. **37**(6): p. 230-6.
- 693 44. Sanz, L., et al., *The interaction of p62 with RIP links the atypical PKCs to NF-kappaB activation*.  
694 *Embo j*, 1999. **18**(11): p. 3044-53.
- 695 45. Duran, A., et al., *p62 is a key regulator of nutrient sensing in the mTORC1 pathway*. *Mol Cell*,  
696 2011. **44**(1): p. 134-46.
- 697 46. Komatsu, M., et al., *The selective autophagy substrate p62 activates the stress responsive*  
698 *transcription factor Nrf2 through inactivation of Keap1*. *Nat Cell Biol*, 2010. **12**(3): p. 213-23.

- 699 47. Rusten, T.E. and H. Stenmark, *p62, an autophagy hero or culprit?* Nat Cell Biol, 2010. **12**(3): p.  
700 207-9.
- 701 48. Afonso, S., G. Vanore, and A. Batlle, *Protoporphyrin IX and oxidative stress*. Free Radic Res, 1999.  
702 **31**(3): p. 161-70.
- 703 49. Baird, L. and M. Yamamoto, *The Molecular Mechanisms Regulating the KEAP1-NRF2 Pathway*.  
704 Mol Cell Biol, 2020. **40**(13).
- 705

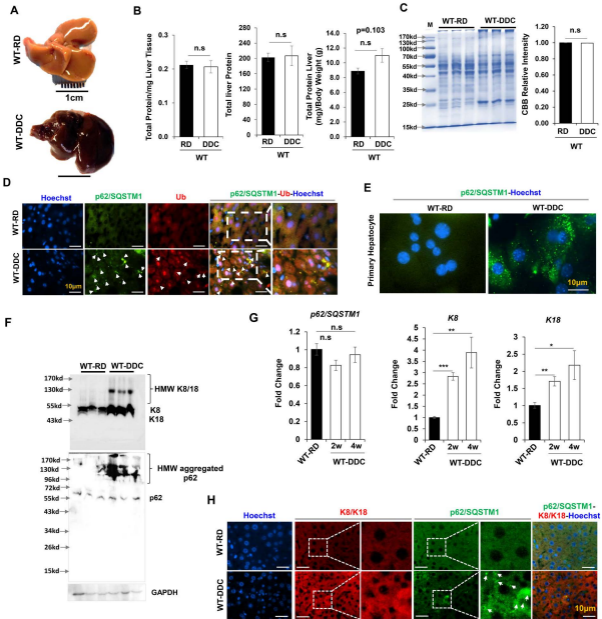

A

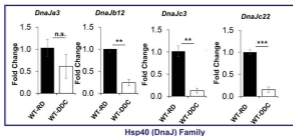

B

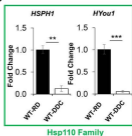

C

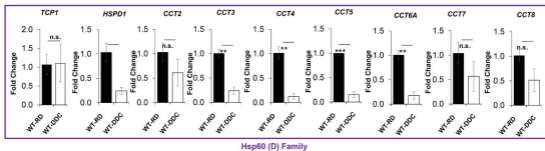

D

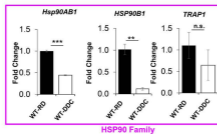

E

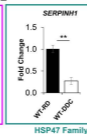

F

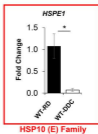

G

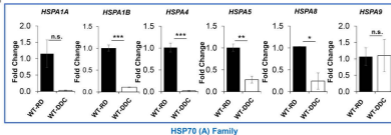

H

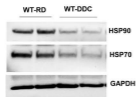

I

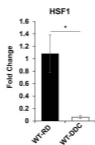

J

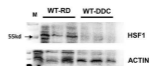

**A**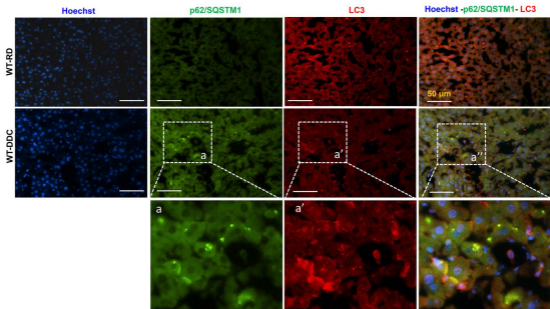

± CQ(60mg/Kg,i.p)

**B**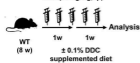**C**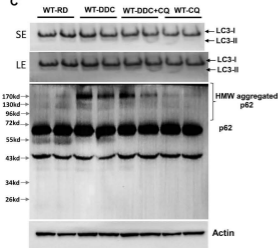**D**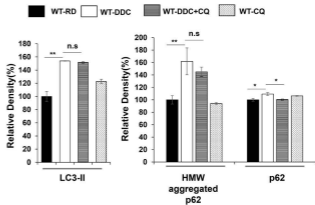

**A**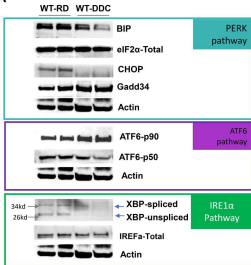**B**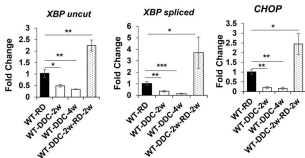

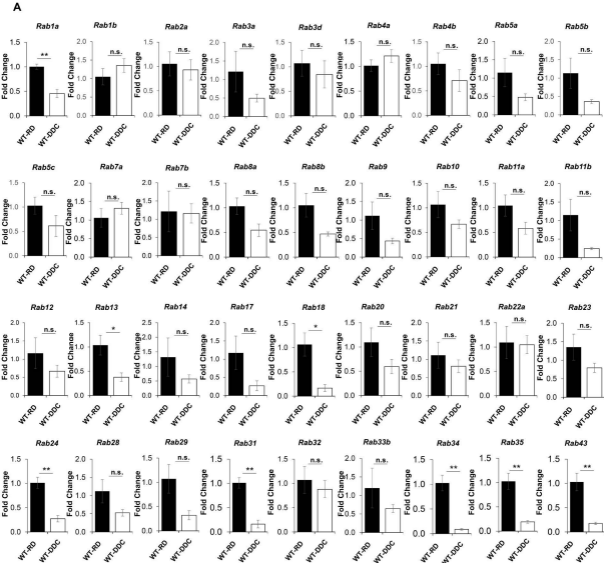

**B**

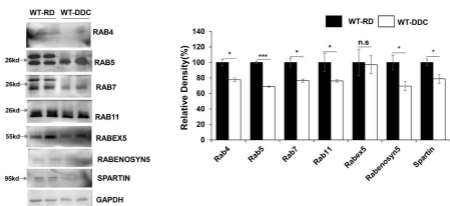

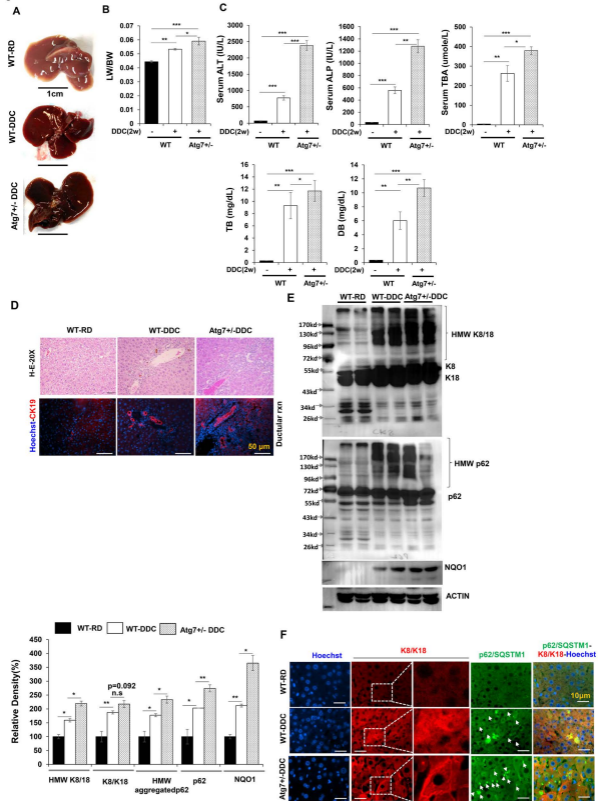



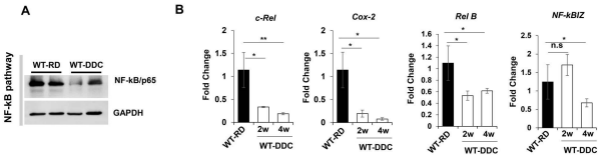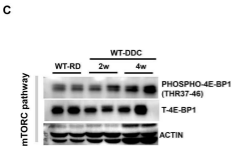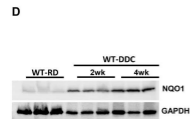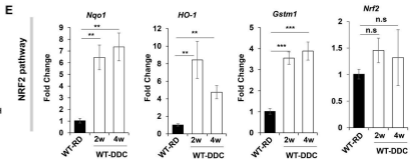

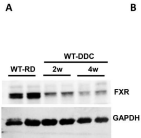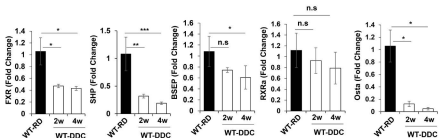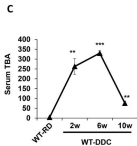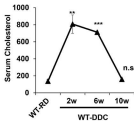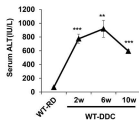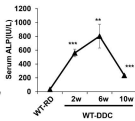

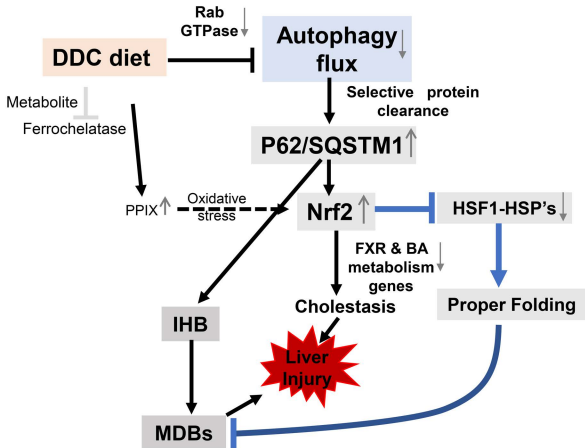

**A**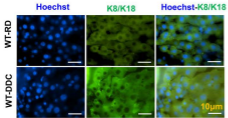**B**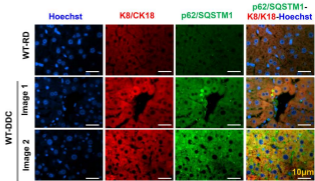

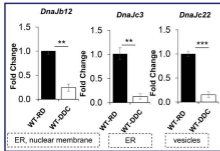

Hsp40 (DnaJ) Family

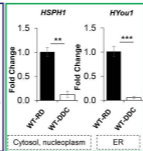

Hsp110 Family

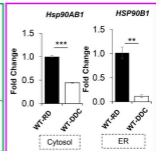

HSP90 Family

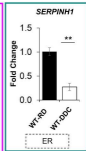

HSP47

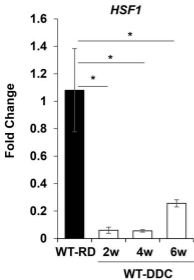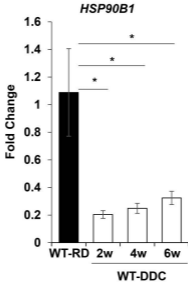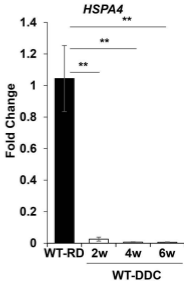

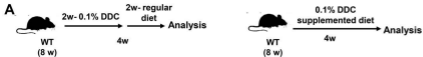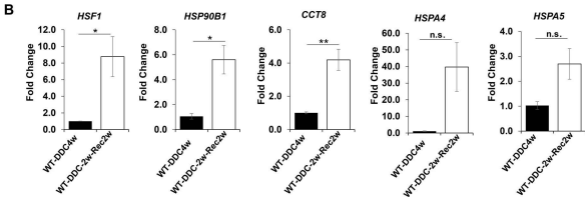

**A**

WT-RD

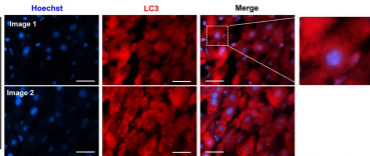

WT-DDC

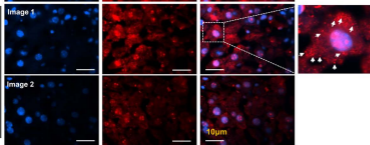**B**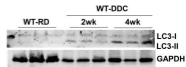



**A**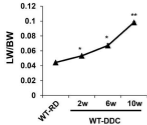**B**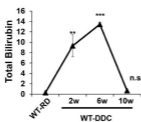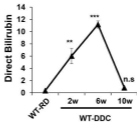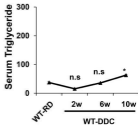

### Transporter-Apical

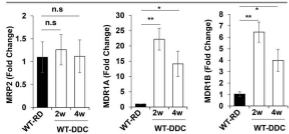

### Transporter-Systemic

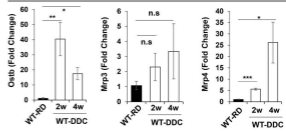

### Transporter: Basolateral-Enterohepatic

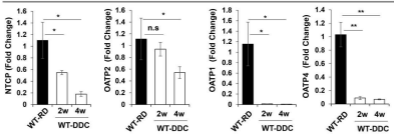

**A**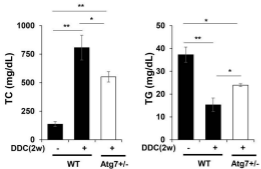**B**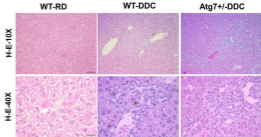

Source: https://www.biorxiv.org/content/10.1101/2022.05.27.493749v1.full.pdf
